# Supplementary material for: Quantitative Analysis of Fungal Contamination of Different Herbal Medicines in China
Source: MDPI journal article supplement (doi:10.3390/toxins16050229), 2024-05-15
Supplement: s1 [file s1]

# Supplementary Materials: Quantitative Analysis of Fungal Contamination of Different Herbal Medicines in China

Gang Wang <sup>1,2</sup>, Mingyue Jiao <sup>1,2</sup>, Junqiang Hu <sup>2,3</sup>, Yiren Xun <sup>1,2</sup>, Longyun Chen <sup>1,2</sup>, Jianbo Qiu <sup>2</sup>, Fang Ji <sup>2</sup>, Yin-Won Lee <sup>4</sup>, Jianrong Shi <sup>2</sup> and Jianhong Xu <sup>1,2,\*</sup>

<sup>1</sup> School of Food and Biological Engineering, Jiangsu University, Zhenjiang 212013, China;

wanggang2015@jaas.ac.cn (G.W.); jiaomy2021@163.com (M.J.);

xunyr2017@163.com (Y.X.); clyun99@163.com (L.C.)

<sup>2</sup> Jiangsu Key Laboratory for Food Quality and Safety-State Key Laboratory Cultivation Base, Ministry of Science and Technology/Key Laboratory for Agro-product Safety Risk Evaluation (Nanjing), Ministry of Agriculture and Rural Affairs/Key Laboratory for Control Technology and Standard for Agro-Product Safety and Quality, Ministry of Agriculture and Rural Affairs/Collaborative Innovation Center for Modern Grain Circulation and Safety/Institute of Food Safety and Nutrition, Jiangsu Academy of Agricultural Sciences, Nanjing 210014, China;

2021216027@stu.njau.edu.cn (J.H.); 20120027@jaas.ac.cn (J.Q.);

jifang625@126.com (F.J.); jianrong63@126.com (J.S.)

<sup>3</sup> Key Laboratory of Agricultural Environmental Microbiology, Ministry of Agriculture, College of Life

Sciences, Nanjing Agricultural University, Nanjing 210095, China

<sup>4</sup> Department of Agricultural Biotechnology, Seoul National University, Seoul 08826, Republic of Korea; lee2443@snu.ac.kr

\* Correspondence: xjh@jaas.ac.cn

**Table S1.** Sources of the herbal medicines used in this study

| Category          | Samples (n)                             | Place of origin                        |
|-------------------|-----------------------------------------|----------------------------------------|
| Fructus           | <i>Crataegus pinnatifida</i> (6)        | Yinan, Shandong / Nanyang, Henan       |
|                   | <i>Gardenia flos</i> (6)                | Fuding, Fujian / Jiujiang, Jiangxi     |
|                   | <i>Semen euryales</i> (6)               | Zhaoqing, Guangdong / Jining, Shandong |
|                   | <i>Semen sesami nigrum</i> (6)          | Fuyang, Anhui / Zhoukou, Henan         |
|                   | <i>Hovenia dulcis</i> (6)               | Dushan, Guizhou / Ankang, Shanxi       |
|                   | <i>Mulberry</i> (6)                     | Yancheng, Jiangsu / Guangyuan, Sichuan |
|                   | <i>Cannabis sativa</i> (6)              | Taizhou, Jiangsu / Jincheng, Shanxi    |
|                   | <i>Semen ziziphi spinosae</i> (6)       | Taizhou, Jiangsu / Xingtai, Hebei      |
| Radix and rhizome | <i>Cornus officinalis</i> (6)           | Taizhou, Jiangsu / Luoyang, Henan      |
|                   | <i>Pseudostellaria heterophylla</i> (6) | Taizhou, Jiangsu / Zherong, Fujian     |
|                   | <i>Panax quinquefolium</i> (6)          | Xinbin, Liaoning / Fusong, Jilin       |
|                   | <i>Rhizoma phragmitis</i> (6)           | Xuzhou, Jiangsu / Shangqiu, Henan      |
|                   | <i>Glycyrrhiza uralensis</i> (6)        | Taizhou, Jiangsu / Longxi, Gansu       |
|                   | <i>Angelica sinensis</i> (6)            | Longnan, Gansu / Yaan, Sichuan         |
|                   | <i>Scutellaria baicalensis</i> (6)      | Taizhou, Jiangsu / Yuncheng, Shanxi    |
|                   | <i>Dioscorea opposita</i> (6)           | Jiaozuo, Henan / Yulin, Guangxi        |
| Whole herbs       | <i>Pueraria lobata</i> (6)              | Taizhou, Jiangsu / Tengxian, Guangxi   |
|                   | <i>Taraxacum mongolicum</i> (6)         | Taizhou, Jiangsu / Tianshui, Gansu     |
|                   | <i>Epimedium brevicornum</i> Maxim. (6) | Taizhou, Jiangsu / Xihe, Gansu         |
| Folium            | <i>Folium mori</i> (6)                  | Yancheng, Jiangsu / Taizhou, Jiangsu   |
|                   | <i>Nelumbinis folium</i> (6)            | Fuzhou, Jiangxi / Caoxian, Shandong    |
| Blossom           | <i>Lonicera japonica</i> (6)            | Linyi, Shandong / Suiyang, Guizhou     |
| Vine              | <i>Dendrobium officinale</i> (6)        | Dehong, Yunnan / Huoshan, Anhui        |

**Table S2.** Frequency of fungal contamination from different herbal medicines

| Herbs                               | Counts | Frequency (%) |
|-------------------------------------|--------|---------------|
| <i>Taraxacum mongolicum</i>         | 46     | 26.59         |
| <i>Lonicera japonica</i>            | 11     | 6.36          |
| <i>Folium mori</i>                  | 7      | 4.05          |
| <i>Glycyrrhiza uralensis</i>        | 7      | 4.05          |
| <i>Cannabis sativa</i>              | 6      | 3.47          |
| <i>Semen ziziphi spinosae</i>       | 5      | 2.89          |
| <i>Cornus officinalis</i>           | 5      | 2.89          |
| <i>Epimedium brevicornum</i> Maxim. | 4      | 2.31          |
| <i>Nelumbinis folium</i>            | 4      | 2.31          |
| <i>Pseudostellaria radix</i>        | 10     | 5.78          |
| <i>Panax quinquefolium radix</i>    | 7      | 4.05          |
| <i>Rhizoma phragmitis</i>           | 7      | 4.05          |
| <i>Semen euryales</i>               | 6      | 3.47          |
| <i>Angelica sinensis radix</i>      | 4      | 2.31          |
| <i>Gardenia flos</i>                | 8      | 4.62          |
| <i>Dendrobium officinale</i>        | 4      | 2.31          |
| <i>Scutellaria baicalensis</i>      | 3      | 1.73          |
| <i>Crataegus pinnatifida</i>        | 2      | 1.16          |
| <i>Dioscorea opposita</i>           | 10     | 5.78          |
| <i>Pueraria lobata</i>              | 2      | 1.16          |
| <i>Semen sesami nigrum</i>          | 4      | 2.31          |
| <i>Hovenia dulcis</i>               | 7      | 4.05          |
| <i>Mulberry fructus</i>             | 4      | 2.31          |
| Total                               | 173    | 100           |

**Table S3.** Frequency of fungal contamination from *Taraxacum mongolicum*

| Category                      | Place of origin     |                    |                     |                     |                    |                       |                   |                |
|-------------------------------|---------------------|--------------------|---------------------|---------------------|--------------------|-----------------------|-------------------|----------------|
|                               | Taizhou,<br>Jiangsu | Tianshui,<br>Gansu | Yuncheng,<br>Shanxi | Zhengzhou,<br>Henan | Linyi,<br>Shandong | Hangzhou,<br>Zhejiang | Yulin,<br>Guangxi | Luan,<br>Anhui |
| <i>Fusarium spp.</i>          | 5                   | 3                  | 2                   | 2                   | 3                  | 2                     | 2                 | 1              |
| <i>Alternaria spp.</i>        | 2                   | 4                  | 1                   | -                   | 2                  | -                     | 3                 | 3              |
| <i>Epicoccum spp.</i>         | -                   | 1                  | 1                   | -                   | -                  | 1                     | -                 | -              |
| <i>Nigrospora spp.</i>        | 1                   | -                  | -                   | -                   | -                  | -                     | -                 | -              |
| <i>Trichocladium spp.</i>     |                     | -                  | 1                   | -                   | -                  | -                     | -                 | -              |
| <i>Aspergillus spp.</i>       | 1                   | -                  | -                   | 1                   | -                  | -                     | -                 | -              |
| <i>Microdochium spp.</i>      | -                   | -                  | 1                   | -                   | -                  | -                     | -                 | -              |
| <i>Botrytis spp.</i>          | -                   | -                  | -                   | -                   | 1                  | -                     |                   |                |
| <i>Penicilium spp.</i>        | 1                   | -                  | -                   | -                   | -                  | -                     | -                 | -              |
| <i>Neopestalotiopsis spp.</i> | -                   | -                  | -                   | -                   | -                  | 1                     | -                 | -              |

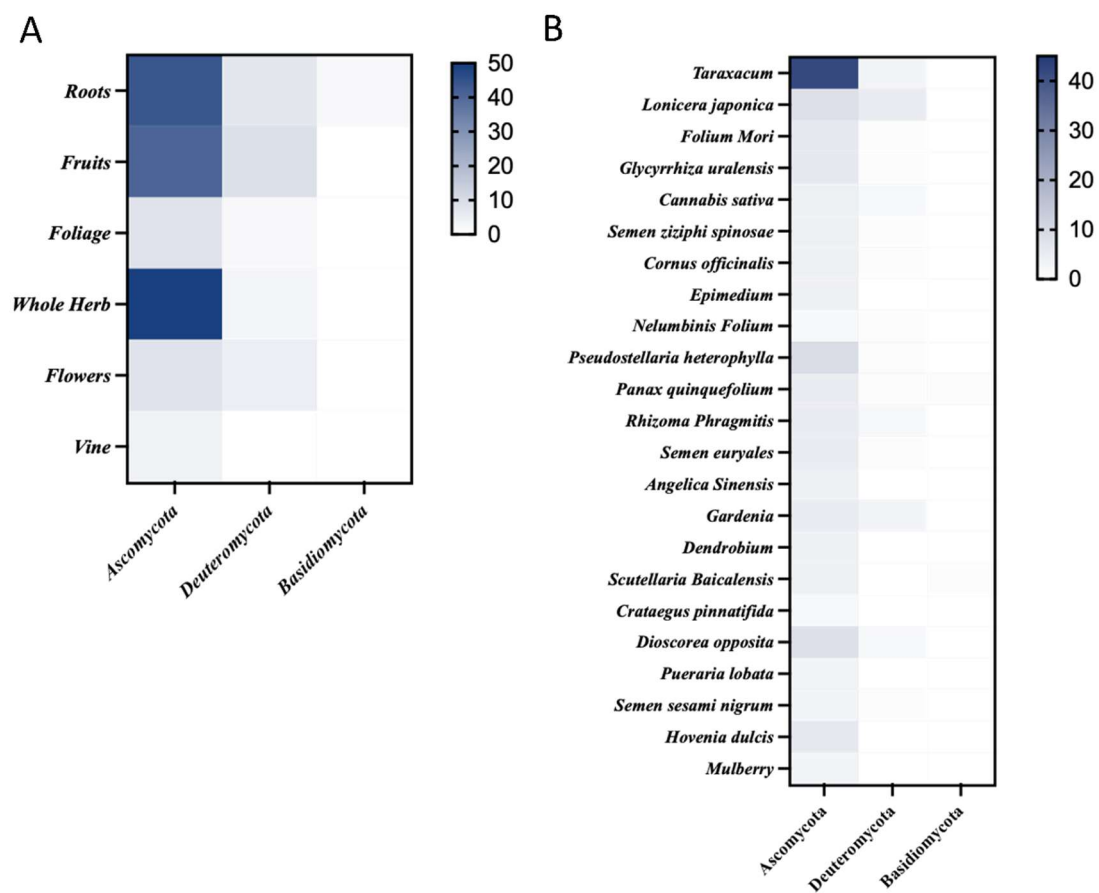

**Figure S1.** Contamination assessment of phytopathogenic fungi on different kinds of herbal medicines on a phylum level.

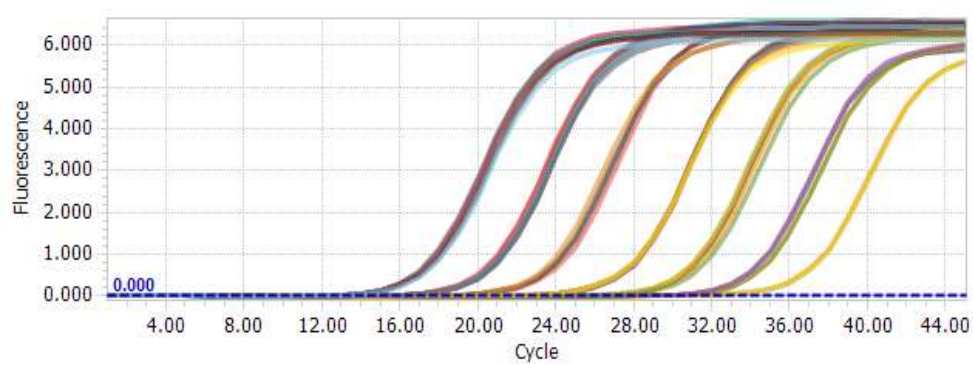

(A)

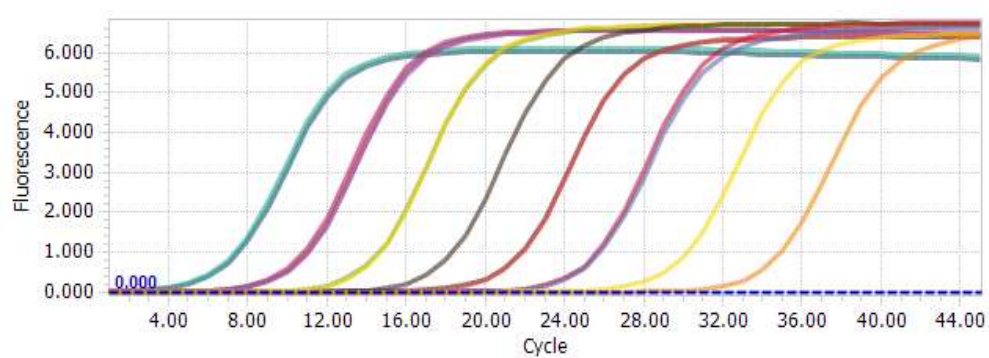

(B)

**Figure S2.** Sensitivity of the RT-qPCR assay for detection of *Fusarium* spp. (A) and *Alternaria* spp. (B)

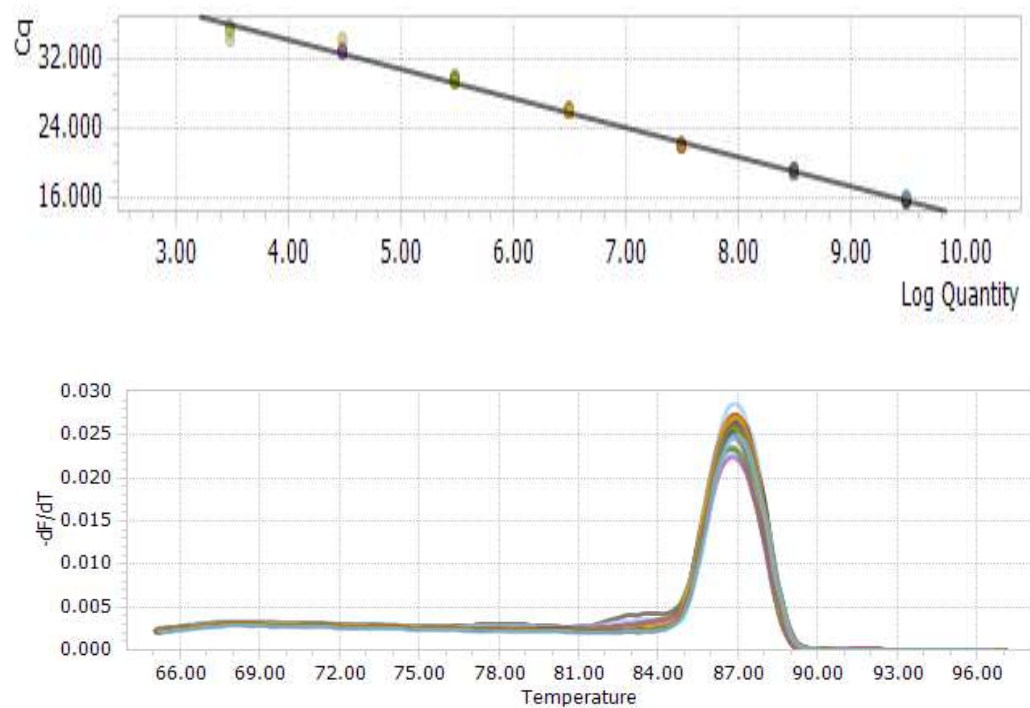

**Figure S3.** The calibration curve and dissociation curve of recombinant plasmids amplification products for *Fusarium EF-1 $\alpha$*  gene

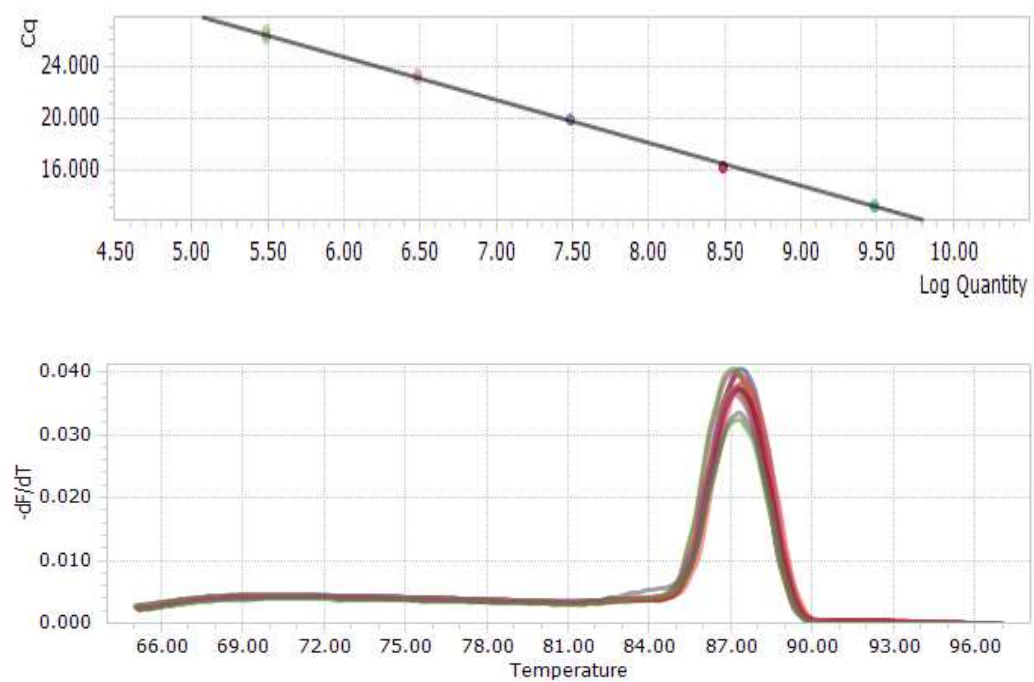

**Figure S4.** The external calibration curve and dissociation curve of recombinant plasmids amplification products for *Alternaria AQAltpks* gene



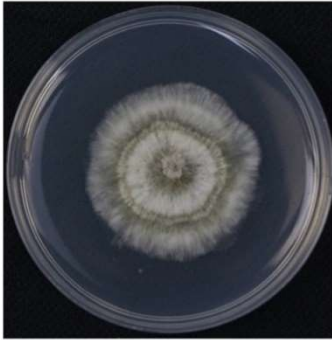

*Trichocladium sp.*

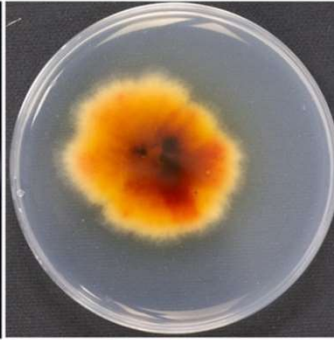

*Epicoccum sp.*

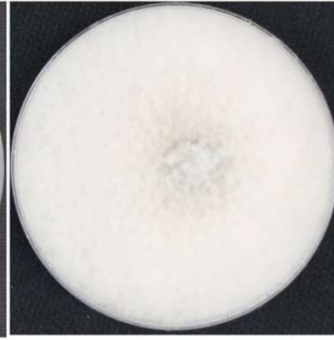

*Nigrospora sp.*

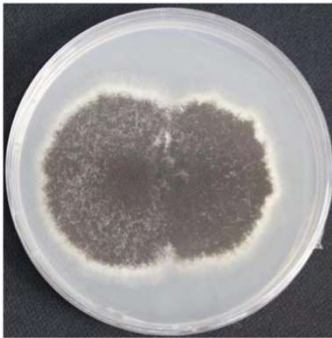

*Aspergillus sp.*

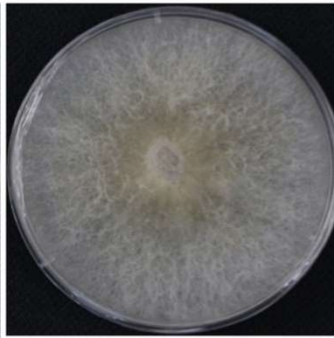

*Botrytis sp.*

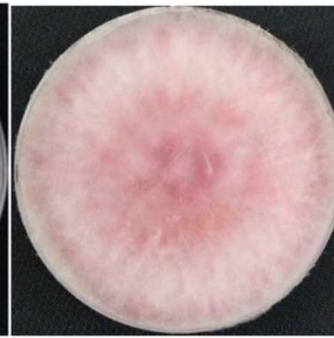

*Fusarium sp.*

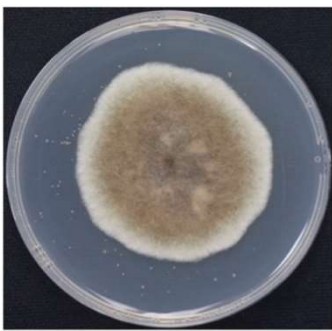

*Alternaria sp.*

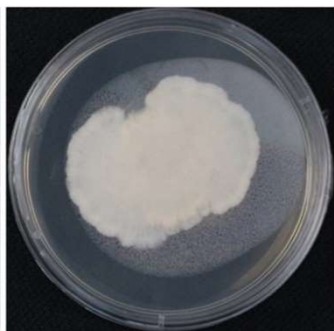

*Bipolaris sp.*

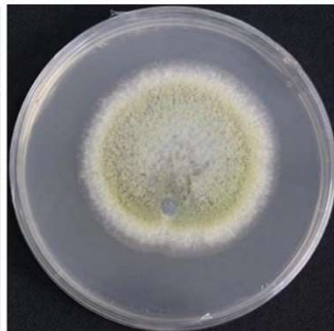

*Penicillium sp.*

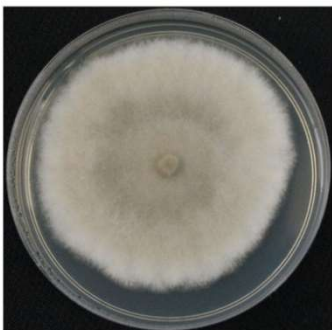

*Curvularia sp.*

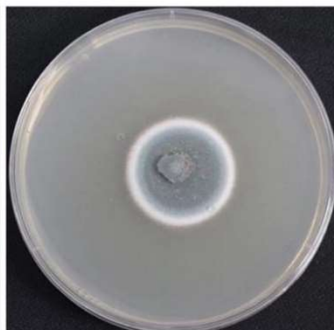

*Cladosporium sp.*

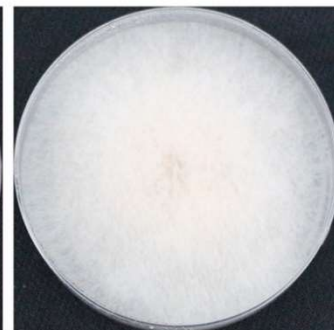

*Apiospora sp.*

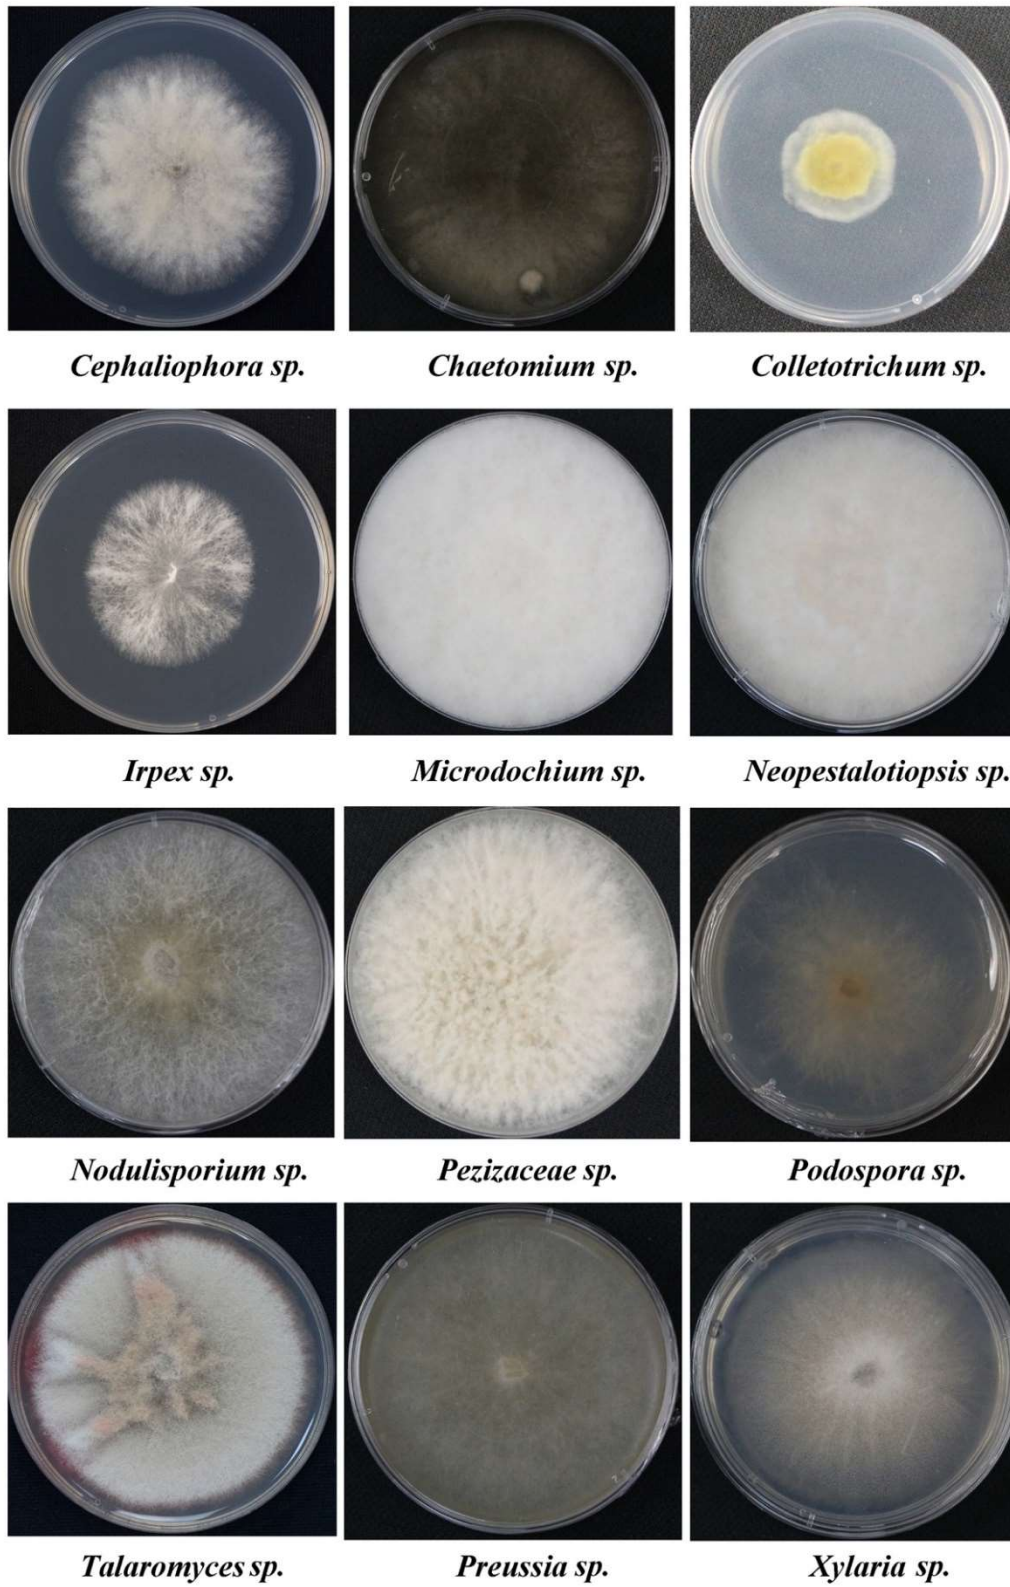

**Figure S5.** Colonial morphology of all the 24 genera of isolated fungi grown on PDA at 25 °C for 5 days
